# Supplementary material for: Efficacy of probiotics in multiple sclerosis: a systematic review of preclinical trials and meta-analysis of randomized controlled trials
Source: Royal Society of Chemistry journal article supplement (doi:10.1039/d0fo03203d), 2021-01-01
Supplement: d0fo03203d2.xlsx [file d0fo03203d2.xlsx]

## Sheet: Intro
	Instructions for the assessment form					Instructions for the summary					Instructions for the figure					Instructions for generating a print view					Instructions for the discrepancy check

## Sheet: Results
Basic information													Domain 1. Randomization process										Domain 2. Deviations from intended interventions																		Domain 3. Mising outcome data
Time	Unique ID	Assessor	Study ID	Reference	Experimental	Comparator	Outcome	Results	Aim	Effect of adhering to intervention?	Weight	Sources	1.1	1.2	Note for 1.1&1.2	1.3	Note for 1.3	1.0 Algorithm result	1.0 Assessor's Judgement	1.0 General note	1.0 Optional Question	1.0 Note for optional question	2.1	2.2	Note for 2.1&2.2	2.3	Note for 2.3	2.4	Note for 2.4	2.5	Note for 2.5	2.6	Note for 2.6	2.7	Note for 2.7	2.0 Algorithm result	2.0 Assessor's Judgement	2.0 General Notes	2.0 Optional Question	2.0 Note for optional question	3.1	Note for 3.1	3.2	Note for 3.2	3.3	Note for 3.3&3.4	3.4	Note for 3.4 (not use)	3.0 Algorithm result
2020/09/01 20.23	A1	Wang	IRCT201511015623N59	Clin Nutr. 2017;36(5):1245-1249	probiotic	placebo	EDSS, parameters of mental health, inflammatory factors, markers of insulin		assignment to intervention (the 'intention-to-treat' effect)	NA	1	Non-commercial trial registry record (e.g. ClinicalTrials.gov record)	Y	PY	Randomization as blinding was done using computer-generated random numbers by a trained staff at the clinic.	N	The distribution of gender, mean age, MS duration, height, weight and BMI as well as METs at baseline and end-of-trial and interferon beta-1a therapy were not statistically different between the two groups (Table 1). The mean, median and range of EDSS in probiotic and placebo groups before the intervention were 2.3, 2.0, 0e4.5 and 2.2, 2.5, 0e4.0, respectively. Based on the 3-day dietary records …	Low	Low				N	N	This intervention was designed as a 12-week randomized, doubleblind and placebo-controlled clinical trial.The probiotic and placebo capsules were resembled in color, shape, size, packaging, smell and taste.	NA		NA		NA		Y	To evaluate whether the variables are normally distributed, KolmogroveSmirnov test were applied to the data. Analyses were conducted via an intention-to-treat (ITT) principle. Unpaired Student t-test was used to detect differences in both anthropometric measures and food intakes between the two groups. To compare categorical variables, we used Pearson Chi-square test. One way repeated measures an…	NA		Low	Low				Y	Among participants in the probiotic and placebo groups, 3 subjects [withdrawn (n = 3)] were excluded (Fig. 1). In the end, 54 subjects [probiotic (n = 27) and placebo (n = 27)] ended the trial.	NA		NA		NA		Low
2020/09/01 20.49	A2	Wang	IRCT2017082234497N2	FF. 52(2019):8-13.	probiotic	placebo	Expanded disability status scale, parameters of mental health, biomarkers of inflammation and oxidative stress, and insulin		assignment to intervention (the 'intention-to-treat' effect)	NA	1		Y	PY	Randomization and blinding was performed before the allocation of patients in the testing groups. This work was performed using computer-generated random numbers that was hidden from the patients and researchers until the end of the analysis. The probiotic and placebo capsules were resembled in color, shape, size, packaging, smell and taste.	N	The t-test analysis showed that mean disease duration, age, height, weight and BMI change at the baseline and end of study were not statistically different in the probiotic compared to placebo group (Table 1). We found no significant change in the mean dietary macro- and micro-nutrient intakes between the two groups throughout the trial.	Low	Low				N	N	This intervention was designed as a 16-week randomized, double-blind, placebo-controlled trial. The probiotic and placebo capsules were resembled in color, shape, size, packaging, smell and taste.	NA		NA		NA		Y	For evaluating whether the variables are normally distributed, Kolmogrov-Smirnov test was applied to the data. Unpaired student ttest was used to detect differences in anthropometric measures, EDSS, parameters of mental health and metabolic indicators between the two groups. To compare categorical variables, we used Pearson Chi-square test. Adjustment for changes in baseline values of biochemical…	NA		Low	Low				Y	All participants in the placebo and probiotic groups were completed the study (n = 24 for each group).	NA		NA		NA		Low
2020/09/01 21.19	A3	Wang	Project Code: NRC-9719	10.1080/1028415X.2020	Probiotic	placebo	circulating levels of BDNF, NGF, IL-6 and mental health		assignment to intervention (the 'intention-to-treat' effect)	NA	1		Y	Y	Randomization lists were computer-generated by a statistician and given to the interviewer. Researchers, patients, neurologist and staff, were blind to the intervention and placebo.	Y	Participants in the probiotic group had higher disease duration in comparison to the control group (7.75 ± 3.99 y vs 5.66 ± 2.53 y; P= 0.014).	Some concerns	Some concerns				N	N	Patients were randomized and allocated to one of the two treatment arms, being either placebo or probiotics.Researchers, patients, neurologist and staff, were blind to the intervention and placebo.	NA		NA		NA		Y		NA		Low	Low				Y	From the 70 patients included in the study, three patients in the intervention group and two patients in the control group were excluded from the trial. Reasons for loss to follow-up were the use of anti-inflammatory drugs, unwillingness to continue participating in the trial, skin sensitivity due to placebo consumption and immigration to another province. After six months of intervention, thirty…	NA		NA		NA		Low
2020/09/01 23.15	B1	Zhang	IRCT201511015623N59	Kouchaki et al 2017	probiotic capsule	placebo	EDSS、BDI total scores、GHQ scores、DASS scores、hs-CRP、NO、TAC、GSH、 MDA、FPG、Insulin 、HOMA-IR、HOMA-B 、QUICKI、TG、TC、VLDL-cholesterol、LDL-cholesterol、HDL-cholesterol、Total-/HDL-cholesterol	based on type 1 error (alpha) of 0.05 and type 2 error (beta) of 0.20 (power = 80%)	assignment to intervention (the 'intention-to-treat' effect)	NA	1	Non-commercial trial registry record (e.g. ClinicalTrials.gov record)	Y	PY	Randomization as blinding was done using computer-generated random numbers by a trained staff at the clinic.The subjects in the placebo group received only starch. The probiotic and placebo capsules were resembled in color, shape, size, packaging, smell and taste.	N	The distribution of gender, mean age, MS duration, height, weight and BMI as well as METs at baseline and end-of-trial and interferon beta-1a therapy were not statistically different between the two groups (Table 1). The mean, median and range of EDSS in probiotic and placebo groups before the intervention were 2.3, 2.0, 0-4.5 and 2.2, 2.5, 0-4.0, respectively.	Low	Low				N	PN	This intervention (done between December 2015 through February 2016) was designed as a 12-week randomized, doubleblind and placebo-controlled clinical trial.	NA		NA		NA		Y	2.14. Statistical methods：To evaluate whether the variables are normally distributed, KolmogroveSmirnov test were applied to the data. Analyses were conducted via an intention-to-treat (ITT) principle. Unpaired Student t-test was used to detect differences in both anthropometric measures and food intakes between the two groups. To compare categorical variables, we used Pearson Chi-square test. On…	NA		Low	Low				PY	Among participants in the probiotic and placebo groups, 3 subjects [withdrawn (n=3)] were excluded (Fig. 1). In the end, 54 subjects [probiotic (n=27) and placebo (n=27)] ended the trial. However, as the analysis was based on the ITT principle, all 60 persons were included in the final analysis. The rate of compliance in our trial was high, such that more than 90% of probiotic capsules were consu…	NA		NA		NA		Low
2020/09/01 23.37	B2	Zhang	IRCT2017082234497N2	Salami 2019	probiotic bacteria	placebo	EDSS、BDI total scores、GHQ scores、DASS scores、SOD、8-OHdG、MDA、GSH 、TAC、IL-6 、IL-10、TNF-α、hs-CRP、NO、FPG、Insulin 、HOMA-IR、QUICKI	standard formula suggested for clinical trials by considering type one error (α) of 0.05 and type two error (β) of 0.20 (power = 80%).	assignment to intervention (the 'intention-to-treat' effect)	NA	1		Y	Y	Randomization and blinding was performed before the allocation of patients in the testing groups. This work was performed using computer-generated random numbers that was hidden from the patients and researchers until the end of the analysis.	N	The t-test analysis showed that mean disease duration (4.2 ± 0.42 vs. 5.2 ± 0.76, years; P = 0.26), age (34.79 ± 1.06 vs. 36.54 ± 1.44, years; P = 0.33), height (168.4 ± 1.68 vs. 166.7 ± 1.84, cm; P = 0.49), weight (−0.2 ± 0.4 vs. −0.8 ± 0.17, kg; P = 0.17) and BMI change (−0.1 ± 0.15 vs. −0.3 ± 0.05, kg/m2; P = 0.2) at the baseline and end of study were not statistically different in the probiot…	Low	Low				N	N	This work was performed using computer-generated random numbers that was hidden from the patients and researchers until the end of the analysis.	NA		NA		NA		Y	2.17. Statistical methods For evaluating whether the variables are normally distributed, Kolmogrov-Smirnov test was applied to the data. Unpaired student ttest was used to detect differences in anthropometric measures, EDSS, parameters of mental health and metabolic indicators between the two groups. To compare categorical variables, we used Pearson Chi-square test. Adjustment for changes in base…	NA		Low	Low				Y	All participants in the placebo and probiotic groups were completed the study (n = 24 for each group) (Fig. 1). The rate of compliance in the present study was high, such that more than 90% of the prescribed capsules were consumed in both groups. There was no side effect after probiotic consumption in the patients.	NA		NA		NA		Low
2020/09/01 23.53	B3	Zhang	DOI: 10.1080/1028415X.2020.1758887	Rahimlou et al 2020	Multi-Strain Probiotic	placebo	GHQ scores、BDI total scores、Fatigue Severity Scale (FSS)、Pain Rating Index (PRI) 、Serum BDNF, NGF and IL-6		assignment to intervention (the 'intention-to-treat' effect)	NA	1		Y	Y	Randomization lists were computer-generated by a statistician and given to the interviewer. Researchers, patients, neurologist and staff, were blind to the intervention and placebo.	PY	The basic characteristics of the participants in this study are presented in Table 1. The study included 47 women (26 women in the intervention group and 21 women in the control group) and 18 men (6 men in the intervention group and 12 men in the control group). Also, the mean age of the participants was 42.15 ± 11.98 in the intervention group and 39.9 ± 8.76 in the control group. Participants in…	Some concerns	Some concerns				N	N	Researchers, patients, neurologist and staff, were blind to the intervention and placebo.	NA		NA		NA		Y	2.5. Statistical analysis： Data analyzed by SPSS19 software. To examine whether the variables are normally distributed, we used from the Kolmogorov–Smirnov test. If the distribution of data was non-normally, non-parametric methods were used. Independent sample t-test was used for comparing the differences in variables between the two groups. Within-group, analyses were conducted using paired samp…	NA		Low	Low				Y	From the 70 patients included in the study, three patients in the intervention group and two patients in the control group were excluded from the trial. Reasons for loss to follow-up were the use of anti-inflammatory drugs, unwillingness to continue participating in the trial, skin sensitivity due to placebo consumption and immigration to another province. After six months of intervention, thirty…	NA		NA		NA		Low
[truncated: 35 more columns]

## Sheet: Summary
Unique ID	Reviewer	Study ID	Reference	Experimental	Comparator	Outcome	Result	Aim	Effect of adhering to intervention?	Weight	Randomization process	Deviations from intended interventions	Mising outcome data	Measurement of the outcome	Selection of the reported result	Overall Bias					Randomization process	Deviations from intended interventions	Mising outcome data	Measurement of the outcome	Selection of the reported result	Overall Bias
A1	Wang	IRCT201511015623N59	Clin Nutr. 2017;36(5):1245-1249	probiotic	placebo	EDSS, parameters of mental health, inflammatory factors, markers of insulin		assignment to intervention (the 'intention-to-treat' effect)	NA	1	Low	Low	Low	Low	Low	Low				Assignment to intervention (the 'intention-to-treat' effect)
A2	Wang	IRCT2017082234497N2	FF. 52(2019):8-13.	probiotic	placebo	Expanded disability status scale, parameters of mental health, biomarkers of inflammation and oxidative stress, and insulin		assignment to intervention (the 'intention-to-treat' effect)	NA	1	Low	Low	Low	Low	Low	Low				Total number of study = 3
A3	Wang	Project Code: NRC-9719	10.1080/1028415X.2020	Probiotic	placebo	circulating levels of BDNF, NGF, IL-6 and mental health		assignment to intervention (the 'intention-to-treat' effect)	NA	1	Some concerns	Low	Low	Low	Low	Some concerns				Low risk	66.7	100	100	100	100	66.7
																				Some concerns	33.3	0	0	0	0	33.3
																				High risk	0	0	0	0	0	0
																				Adhering to intervention (the 'per-protocol' effect)
																				Total number of study = 0
																				Low risk
																				Some concerns
																				High risk

## Sheet: Figures
Studies with intention-to-treat	Unique ID	Study ID	Experimental	Comparator	Outcome	Weight	Randomization process	Deviations from intended interventions	Missing outcome data	Measurement of the outcome	Selection of the reported result	Overall					Studies with pre-protocol	Unique ID	Study ID	Experimental	Comparator	Outcome	Weight	Randomization process	Deviations from intended interventions	Missing outcome data	Measurement of the outcome	Selection of the reported result	Overall
	A1	IRCT201511015623N59	probiotic	placebo	EDSS, parameters of mental health, inflammatory factors, markers of insulin	1									Low risk
	A2	IRCT2017082234497N2	probiotic	placebo	Expanded disability status scale, parameters of mental health, biomarkers of inflammation and oxidative stress, and insulin	1									Some concerns
	A3	Project Code: NRC-9719	Probiotic	placebo	circulating levels of BDNF, NGF, IL-6 and mental health	1									High risk

## Sheet: Print (ITT)
Unique ID	A1	Study ID	IRCT201511015623N59	Assessor	Wang
Ref or Label	Clin Nutr. 2017;36(5):1245-1249	Aim	assignment to intervention (the 'intention-to-treat' effect)
Experimental	probiotic	Comparator	placebo	Source	Non-commercial trial registry record (e.g. ClinicalTrials.gov record)
Outcome	EDSS, parameters of mental health, inflammatory factors, markers of insulin	Results		Weight	1
Domain	Signalling question			Response	Comments
Bias arising from the randomization process	1.1 Was the allocation sequence random?			Y	Randomization as blinding was done using computer-generated random numbers by a trained staff at the clinic.
	1.2 Was the allocation sequence concealed until participants were enrolled and assigned to interventions?			PY
	1.3 Did baseline differences between intervention groups suggest a problem with the randomization process?			N	The distribution of gender, mean age, MS duration, height, weight and BMI as well as METs at baseline and end-of-trial and interferon beta-1a therapy were not statistically different between the two groups (Table 1). The mean, median and range of EDSS in probiotic and placebo groups before the intervention were 2.3, 2.0, 0e4.5 and 2.2, 2.5, 0e4.0, respectively. Based on the 3-day dietary records …
	Risk of bias judgement			Low
Bias due to deviations from intended interventions	2.1.Were participants aware of their assigned intervention during the trial?			N	This intervention was designed as a 12-week randomized, doubleblind and placebo-controlled clinical trial.The probiotic and placebo capsules were resembled in color, shape, size, packaging, smell and taste.
	2.2.Were carers and people delivering the interventions aware of participants' assigned intervention during the trial?			N
	2.3. If Y/PY/NI to 2.1 or 2.2: Were there deviations from the intended intervention that arose because of the experimental context?			NA
	2.4 If Y/PY to 2.3: Were these deviations likely to have affected the outcome?			NA
	2.5. If Y/PY/NI to 2.4: Were these deviations from intended intervention balanced between groups?			NA
	2.6 Was an appropriate analysis used to estimate the effect of assignment to intervention?			Y	To evaluate whether the variables are normally distributed, KolmogroveSmirnov test were applied to the data. Analyses were conducted via an intention-to-treat (ITT) principle. Unpaired Student t-test was used to detect differences in both anthropometric measures and food intakes between the two groups. To compare categorical variables, we used Pearson Chi-square test. One way repeated measures an…
	2.7 If N/PN/NI to 2.6: Was there potential for a substantial impact (on the result) of the failure to analyse participants in the group to which they were randomized?			NA
	Risk of bias judgement			Low
Bias due to missing outcome data	3.1 Were data for this outcome available for all, or nearly all, participants randomized?			Y	Among participants in the probiotic and placebo groups, 3 subjects [withdrawn (n = 3)] were excluded (Fig. 1). In the end, 54 subjects [probiotic (n = 27) and placebo (n = 27)] ended the trial.
	3.2 If N/PN/NI to 3.1: Is there evidence that result was not biased by missing outcome data?			NA
	3.3 If N/PN to 3.2: Could missingness in the outcome depend on its true value?			NA
	3.4 If Y/PY/NI to 3.3: Is it likely that missingness in the outcome depended on its true value?			NA
	Risk of bias judgement			Low
Bias in measurement of the outcome	4.1 Was the method of measuring the outcome inappropriate?			N	Twelve-hour fasting blood samples were collected at weeks 0 and 12 at Central Reference Laboratory of Kashan. Serum highsensitivity C-reactive protein (hs-CRP) was quantified using an ELISA kit (LDN, Nordhorn, Germany). Plasma nitric oxide (NO) was measured by the Giess method. Total antioxidant capacity (TAC) of plasma was determined by the ferric reducing antioxidant power method. GSH was asses…
	4.2 Could measurement or ascertainment of the outcome have differed between intervention groups?			N
	4.3 Were outcome assessors aware of the intervention received by study participants?			N
	4.4 If Y/PY/NI to 4.3: Could assessment of the outcome have been influenced by knowledge of intervention received?			NA
	4.5 If Y/PY/NI to 4.4: Is it likely that assessment of the outcome was influenced by knowledge of intervention received?			NA
	Risk of bias judgement			Low
Bias in selection of the reported result	5.1 Were the data that produced this result analysed in accordance with a pre-specified analysis plan that was finalized before unblinded outcome data were available for analysis?			Y
	5.2 ... multiple eligible outcome measurements (e.g. scales, definitions, time points) within the outcome domain?			N
	5.3 ... multiple eligible analyses of the data?			N
	Risk of bias judgement			Low
Overall bias	Risk of bias judgement			Low
Unique ID	A2	Study ID	IRCT2017082234497N2	Assessor	Wang
Ref or Label	FF. 52(2019):8-13.	Aim	assignment to intervention (the 'intention-to-treat' effect)
Experimental	probiotic	Comparator	placebo	Source
Outcome	Expanded disability status scale, parameters of mental health, biomarkers of inflammation and oxidative stress, and insulin	Results		Weight	1
Domain	Signalling question			Response	Comments
Bias arising from the randomization process	1.1 Was the allocation sequence random?			Y	Randomization and blinding was performed before the allocation of patients in the testing groups. This work was performed using computer-generated random numbers that was hidden from the patients and researchers until the end of the analysis. The probiotic and placebo capsules were resembled in color, shape, size, packaging, smell and taste.
	1.2 Was the allocation sequence concealed until participants were enrolled and assigned to interventions?			PY
	1.3 Did baseline differences between intervention groups suggest a problem with the randomization process?			N	The t-test analysis showed that mean disease duration, age, height, weight and BMI change at the baseline and end of study were not statistically different in the probiotic compared to placebo group (Table 1). We found no significant change in the mean dietary macro- and micro-nutrient intakes between the two groups throughout the trial.
	Risk of bias judgement			Low
Bias due to deviations from intended interventions	2.1.Were participants aware of their assigned intervention during the trial?			N	This intervention was designed as a 16-week randomized, double-blind, placebo-controlled trial. The probiotic and placebo capsules were resembled in color, shape, size, packaging, smell and taste.
	2.2.Were carers and people delivering the interventions aware of participants' assigned intervention during the trial?			N
	2.3. If Y/PY/NI to 2.1 or 2.2: Were there deviations from the intended intervention that arose because of the experimental context?			NA
	2.4 If Y/PY to 2.3: Were these deviations likely to have affected the outcome?			NA
	2.5. If Y/PY/NI to 2.4: Were these deviations from intended intervention balanced between groups?			NA
	2.6 Was an appropriate analysis used to estimate the effect of assignment to intervention?			Y	For evaluating whether the variables are normally distributed, Kolmogrov-Smirnov test was applied to the data. Unpaired student ttest was used to detect differences in anthropometric measures, EDSS, parameters of mental health and metabolic indicators between the two groups. To compare categorical variables, we used Pearson Chi-square test. Adjustment for changes in baseline values of biochemical…
	2.7 If N/PN/NI to 2.6: Was there potential for a substantial impact (on the result) of the failure to analyse participants in the group to which they were randomized?			NA
	Risk of bias judgement			Low
Bias due to missing outcome data	3.1 Were data for this outcome available for all, or nearly all, participants randomized?			Y	All participants in the placebo and probiotic groups were completed the study (n = 24 for each group).
	3.2 If N/PN/NI to 3.1: Is there evidence that result was not biased by missing outcome data?			NA
	3.3 If N/PN to 3.2: Could missingness in the outcome depend on its true value?			NA
	3.4 If Y/PY/NI to 3.3: Is it likely that missingness in the outcome depended on its true value?			NA
	Risk of bias judgement			Low
Bias in measurement of the outcome	4.1 Was the method of measuring the outcome inappropriate?			N	For evaluating whether the variables are normally distributed, Kolmogrov-Smirnov test was applied to the data. Unpaired student ttest was used to detect differences in anthropometric measures, EDSS, parameters of mental health and metabolic indicators between the two groups. To compare categorical variables, we used Pearson Chi-square test. Adjustment for changes in baseline values of biochemical…
	4.2 Could measurement or ascertainment of the outcome have differed between intervention groups?			N
	4.3 Were outcome assessors aware of the intervention received by study participants?			PN
	4.4 If Y/PY/NI to 4.3: Could assessment of the outcome have been influenced by knowledge of intervention received?			NA
	4.5 If Y/PY/NI to 4.4: Is it likely that assessment of the outcome was influenced by knowledge of intervention received?			NA
	Risk of bias judgement			Low
Bias in selection of the reported result	5.1 Were the data that produced this result analysed in accordance with a pre-specified analysis plan that was finalized before unblinded outcome data were available for analysis?			Y
	5.2 ... multiple eligible outcome measurements (e.g. scales, definitions, time points) within the outcome domain?			N
	5.3 ... multiple eligible analyses of the data?			N	For evaluating whether the variables are normally distributed, Kolmogrov-Smirnov test was applied to the data. Unpaired student ttest was used to detect differences in anthropometric measures, EDSS, parameters of mental health and metabolic indicators between the two groups. To compare categorical variables, we used Pearson Chi-square test. Adjustment for changes in baseline values of biochemical…
	Risk of bias judgement			Low
Overall bias	Risk of bias judgement			Low
Unique ID	A3	Study ID	Project Code: NRC-9719	Assessor	Wang
Ref or Label	10.1080/1028415X.2020	Aim	assignment to intervention (the 'intention-to-treat' effect)
Experimental	Probiotic	Comparator	placebo	Source
Outcome	circulating levels of BDNF, NGF, IL-6 and mental health	Results		Weight	1
Domain	Signalling question			Response	Comments
Bias arising from the randomization process	1.1 Was the allocation sequence random?			Y	Randomization lists were computer-generated by a statistician and given to the interviewer. Researchers, patients, neurologist and staff, were blind to the intervention and placebo.
	1.2 Was the allocation sequence concealed until participants were enrolled and assigned to interventions?			Y
	1.3 Did baseline differences between intervention groups suggest a problem with the randomization process?			Y	Participants in the probiotic group had higher disease duration in comparison to the control group (7.75 ± 3.99 y vs 5.66 ± 2.53 y; P= 0.014).
	Risk of bias judgement			Some concerns
Bias due to deviations from intended interventions	2.1.Were participants aware of their assigned intervention during the trial?			N	Patients were randomized and allocated to one of the two treatment arms, being either placebo or probiotics.Researchers, patients, neurologist and staff, were blind to the intervention and placebo.
	2.2.Were carers and people delivering the interventions aware of participants' assigned intervention during the trial?			N
	2.3. If Y/PY/NI to 2.1 or 2.2: Were there deviations from the intended intervention that arose because of the experimental context?			NA
	2.4 If Y/PY to 2.3: Were these deviations likely to have affected the outcome?			NA
	2.5. If Y/PY/NI to 2.4: Were these deviations from intended intervention balanced between groups?			NA
	2.6 Was an appropriate analysis used to estimate the effect of assignment to intervention?			Y
	2.7 If N/PN/NI to 2.6: Was there potential for a substantial impact (on the result) of the failure to analyse participants in the group to which they were randomized?			NA
	Risk of bias judgement			Low
Bias due to missing outcome data	3.1 Were data for this outcome available for all, or nearly all, participants randomized?			Y	From the 70 patients included in the study, three patients in the intervention group and two patients in the control group were excluded from the trial. Reasons for loss to follow-up were the use of anti-inflammatory drugs, unwillingness to continue participating in the trial, skin sensitivity due to placebo consumption and immigration to another province. After six months of intervention, thirty…
	3.2 If N/PN/NI to 3.1: Is there evidence that result was not biased by missing outcome data?			NA
	3.3 If N/PN to 3.2: Could missingness in the outcome depend on its true value?			NA
	3.4 If Y/PY/NI to 3.3: Is it likely that missingness in the outcome depended on its true value?			NA
	Risk of bias judgement			Low
Bias in measurement of the outcome	4.1 Was the method of measuring the outcome inappropriate?			N
	4.2 Could measurement or ascertainment of the outcome have differed between intervention groups?			N
	4.3 Were outcome assessors aware of the intervention received by study participants?			PN
	4.4 If Y/PY/NI to 4.3: Could assessment of the outcome have been influenced by knowledge of intervention received?			NA
	4.5 If Y/PY/NI to 4.4: Is it likely that assessment of the outcome was influenced by knowledge of intervention received?			NA
	Risk of bias judgement			Low
Bias in selection of the reported result	5.1 Were the data that produced this result analysed in accordance with a pre-specified analysis plan that was finalized before unblinded outcome data were available for analysis?			Y
	5.2 ... multiple eligible outcome measurements (e.g. scales, definitions, time points) within the outcome domain?			N
	5.3 ... multiple eligible analyses of the data?			N
	Risk of bias judgement			Low
Overall bias	Risk of bias judgement			Some concerns

## Sheet: Check
Basic information													Domain 1. Randomization process										Domain 2. Deviations from intended interventions																		Domain 3. Mising outcome data
Time	Unique ID	Assessor	Study ID	Reference	Experimental	Comparator	Outcome	Results	Aim	Effect of adhering to intervention?	Weight	Sources	1.1	1.2	Note for 1.1&1.2	1.3	Note for 1.3	1.0 Algorithm result	1.0 Assessor's Judgement	1.0 General note	1.0 Optional Question	1.0 Note for optional question	2.1	2.2	Note for 2.1&2.2	2.3	Note for 2.3	2.4	Note for 2.4	2.5	Note for 2.5	2.6	Note for 2.6	2.7	Note for 2.7	2.0 Algorithm result	2.0 Assessor's Judgement	2.0 General Notes	2.0 Optional Question	2.0 Note for optional question	3.1	Note for 3.1	3.2	Note for 3.2	3.3	Note for 3.3&3.4	3.4	Note for 3.4 (not use)	3.0 Algorithm result
2020/09/01 20.23	A1	Wang	IRCT201511015623N59	Clin Nutr. 2017;36(5):1245-1249	probiotic	placebo	EDSS, parameters of mental health, inflammatory factors, markers of insulin		assignment to intervention (the 'intention-to-treat' effect)	NA	1	Non-commercial trial registry record (e.g. ClinicalTrials.gov record)	Y	PY	Randomization as blinding was done using computer-generated random numbers by a trained staff at the clinic.	N	The distribution of gender, mean age, MS duration, height, weight and BMI as well as METs at baseline and end-of-trial and interferon beta-1a therapy were not statistically different between the two groups (Table 1). The mean, median and range of EDSS in probiotic and placebo groups before the intervention were 2.3, 2.0, 0e4.5 and 2.2, 2.5, 0e4.0, respectively. Based on the 3-day dietary records …	Low	Low				N	N	This intervention was designed as a 12-week randomized, doubleblind and placebo-controlled clinical trial.The probiotic and placebo capsules were resembled in color, shape, size, packaging, smell and taste.	NA		NA		NA		Y	To evaluate whether the variables are normally distributed, KolmogroveSmirnov test were applied to the data. Analyses were conducted via an intention-to-treat (ITT) principle. Unpaired Student t-test was used to detect differences in both anthropometric measures and food intakes between the two groups. To compare categorical variables, we used Pearson Chi-square test. One way repeated measures an…	NA		Low	Low				Y	Among participants in the probiotic and placebo groups, 3 subjects [withdrawn (n = 3)] were excluded (Fig. 1). In the end, 54 subjects [probiotic (n = 27) and placebo (n = 27)] ended the trial.	NA		NA		NA		Low
2020/09/01 20.49	A2	Wang	IRCT2017082234497N2	FF. 52(2019):8-13.	probiotic	placebo	Expanded disability status scale, parameters of mental health, biomarkers of inflammation and oxidative stress, and insulin		assignment to intervention (the 'intention-to-treat' effect)	NA	1		Y	PY	Randomization and blinding was performed before the allocation of patients in the testing groups. This work was performed using computer-generated random numbers that was hidden from the patients and researchers until the end of the analysis. The probiotic and placebo capsules were resembled in color, shape, size, packaging, smell and taste.	N	The t-test analysis showed that mean disease duration, age, height, weight and BMI change at the baseline and end of study were not statistically different in the probiotic compared to placebo group (Table 1). We found no significant change in the mean dietary macro- and micro-nutrient intakes between the two groups throughout the trial.	Low	Low				N	N	This intervention was designed as a 16-week randomized, double-blind, placebo-controlled trial. The probiotic and placebo capsules were resembled in color, shape, size, packaging, smell and taste.	NA		NA		NA		Y	For evaluating whether the variables are normally distributed, Kolmogrov-Smirnov test was applied to the data. Unpaired student ttest was used to detect differences in anthropometric measures, EDSS, parameters of mental health and metabolic indicators between the two groups. To compare categorical variables, we used Pearson Chi-square test. Adjustment for changes in baseline values of biochemical…	NA		Low	Low				Y	All participants in the placebo and probiotic groups were completed the study (n = 24 for each group).	NA		NA		NA		Low
2020/09/01 21.19	A3	Wang	Project Code: NRC-9719	10.1080/1028415X.2020	Probiotic	placebo	circulating levels of BDNF, NGF, IL-6 and mental health		assignment to intervention (the 'intention-to-treat' effect)	NA	1		Y	Y	Randomization lists were computer-generated by a statistician and given to the interviewer. Researchers, patients, neurologist and staff, were blind to the intervention and placebo.	Y	Participants in the probiotic group had higher disease duration in comparison to the control group (7.75 ± 3.99 y vs 5.66 ± 2.53 y; P= 0.014).	Some concerns	Some concerns				N	N	Patients were randomized and allocated to one of the two treatment arms, being either placebo or probiotics.Researchers, patients, neurologist and staff, were blind to the intervention and placebo.	NA		NA		NA		Y		NA		Low	Low				Y	From the 70 patients included in the study, three patients in the intervention group and two patients in the control group were excluded from the trial. Reasons for loss to follow-up were the use of anti-inflammatory drugs, unwillingness to continue participating in the trial, skin sensitivity due to placebo consumption and immigration to another province. After six months of intervention, thirty…	NA		NA		NA		Low
2020/09/01 23.15	B1	Zhang	IRCT201511015623N59	Kouchaki et al 2017	probiotic capsule	placebo	EDSS、BDI total scores、GHQ scores、DASS scores、hs-CRP、NO、TAC、GSH、 MDA、FPG、Insulin 、HOMA-IR、HOMA-B 、QUICKI、TG、TC、VLDL-cholesterol、LDL-cholesterol、HDL-cholesterol、Total-/HDL-cholesterol	based on type 1 error (alpha) of 0.05 and type 2 error (beta) of 0.20 (power = 80%)	assignment to intervention (the 'intention-to-treat' effect)	NA	1	Non-commercial trial registry record (e.g. ClinicalTrials.gov record)	Y	PY	Randomization as blinding was done using computer-generated random numbers by a trained staff at the clinic.The subjects in the placebo group received only starch. The probiotic and placebo capsules were resembled in color, shape, size, packaging, smell and taste.	N	The distribution of gender, mean age, MS duration, height, weight and BMI as well as METs at baseline and end-of-trial and interferon beta-1a therapy were not statistically different between the two groups (Table 1). The mean, median and range of EDSS in probiotic and placebo groups before the intervention were 2.3, 2.0, 0-4.5 and 2.2, 2.5, 0-4.0, respectively.	Low	Low				N	PN	This intervention (done between December 2015 through February 2016) was designed as a 12-week randomized, doubleblind and placebo-controlled clinical trial.	NA		NA		NA		Y	2.14. Statistical methods：To evaluate whether the variables are normally distributed, KolmogroveSmirnov test were applied to the data. Analyses were conducted via an intention-to-treat (ITT) principle. Unpaired Student t-test was used to detect differences in both anthropometric measures and food intakes between the two groups. To compare categorical variables, we used Pearson Chi-square test. On…	NA		Low	Low				PY	Among participants in the probiotic and placebo groups, 3 subjects [withdrawn (n=3)] were excluded (Fig. 1). In the end, 54 subjects [probiotic (n=27) and placebo (n=27)] ended the trial. However, as the analysis was based on the ITT principle, all 60 persons were included in the final analysis. The rate of compliance in our trial was high, such that more than 90% of probiotic capsules were consu…	NA		NA		NA		Low
2020/09/01 23.37	B2	Zhang	IRCT2017082234497N2	Salami 2019	probiotic bacteria	placebo	EDSS、BDI total scores、GHQ scores、DASS scores、SOD、8-OHdG、MDA、GSH 、TAC、IL-6 、IL-10、TNF-α、hs-CRP、NO、FPG、Insulin 、HOMA-IR、QUICKI	standard formula suggested for clinical trials by considering type one error (α) of 0.05 and type two error (β) of 0.20 (power = 80%).	assignment to intervention (the 'intention-to-treat' effect)	NA	1		Y	Y	Randomization and blinding was performed before the allocation of patients in the testing groups. This work was performed using computer-generated random numbers that was hidden from the patients and researchers until the end of the analysis.	N	The t-test analysis showed that mean disease duration (4.2 ± 0.42 vs. 5.2 ± 0.76, years; P = 0.26), age (34.79 ± 1.06 vs. 36.54 ± 1.44, years; P = 0.33), height (168.4 ± 1.68 vs. 166.7 ± 1.84, cm; P = 0.49), weight (−0.2 ± 0.4 vs. −0.8 ± 0.17, kg; P = 0.17) and BMI change (−0.1 ± 0.15 vs. −0.3 ± 0.05, kg/m2; P = 0.2) at the baseline and end of study were not statistically different in the probiot…	Low	Low				N	N	This work was performed using computer-generated random numbers that was hidden from the patients and researchers until the end of the analysis.	NA		NA		NA		Y	2.17. Statistical methods For evaluating whether the variables are normally distributed, Kolmogrov-Smirnov test was applied to the data. Unpaired student ttest was used to detect differences in anthropometric measures, EDSS, parameters of mental health and metabolic indicators between the two groups. To compare categorical variables, we used Pearson Chi-square test. Adjustment for changes in base…	NA		Low	Low				Y	All participants in the placebo and probiotic groups were completed the study (n = 24 for each group) (Fig. 1). The rate of compliance in the present study was high, such that more than 90% of the prescribed capsules were consumed in both groups. There was no side effect after probiotic consumption in the patients.	NA		NA		NA		Low
2020/09/01 23.53	B3	Zhang	DOI: 10.1080/1028415X.2020.1758887	Rahimlou et al 2020	Multi-Strain Probiotic	placebo	GHQ scores、BDI total scores、Fatigue Severity Scale (FSS)、Pain Rating Index (PRI) 、Serum BDNF, NGF and IL-6		assignment to intervention (the 'intention-to-treat' effect)	NA	1		Y	Y	Randomization lists were computer-generated by a statistician and given to the interviewer. Researchers, patients, neurologist and staff, were blind to the intervention and placebo.	PY	The basic characteristics of the participants in this study are presented in Table 1. The study included 47 women (26 women in the intervention group and 21 women in the control group) and 18 men (6 men in the intervention group and 12 men in the control group). Also, the mean age of the participants was 42.15 ± 11.98 in the intervention group and 39.9 ± 8.76 in the control group. Participants in…	Some concerns	Some concerns				N	N	Researchers, patients, neurologist and staff, were blind to the intervention and placebo.	NA		NA		NA		Y	2.5. Statistical analysis： Data analyzed by SPSS19 software. To examine whether the variables are normally distributed, we used from the Kolmogorov–Smirnov test. If the distribution of data was non-normally, non-parametric methods were used. Independent sample t-test was used for comparing the differences in variables between the two groups. Within-group, analyses were conducted using paired samp…	NA		Low	Low				Y	From the 70 patients included in the study, three patients in the intervention group and two patients in the control group were excluded from the trial. Reasons for loss to follow-up were the use of anti-inflammatory drugs, unwillingness to continue participating in the trial, skin sensitivity due to placebo consumption and immigration to another province. After six months of intervention, thirty…	NA		NA		NA		Low
[truncated: 35 more columns]

## Sheet: Print_format (PP)
Unique ID		Study ID		Assessor
Ref or Label		Aim	adhering to intervention (the 'per-protocol' effect)	The effect of adhering to intervention…
Experimental		Comparator		Source
Outcome		Results		Weight
Domain	Signalling question			Response	Comments
Bias arising from the randomization process	1.1 Was the allocation sequence random?
	1.2 Was the allocation sequence concealed until participants were enrolled and assigned to interventions?
	1.3 Did baseline differences between intervention groups suggest a problem with the randomization process?
	Risk of bias judgement
Bias due to deviations from intended interventions	2.1 Were participants aware of their assigned intervention during the trial?
	2.2 Were carers and people delivering the interventions aware of participants' assigned intervention during the trial?
	2.3. [If applicable:] If Y/PY/NI to 2.1 or 2.2: Were important non-protocol interventions balanced across intervention groups?
	2.4. [If applicable:] Were there failures in implementing the intervention that could have affected the outcome?
	2.5. [If applicable:] Was there non-adherence to the assigned intervention regimen that could have affected participants’ outcomes?
	2.6. If N/PN/NI to 2.3, or Y/PY/NI to 2.4 or 2.5: Was an appropriate analysis used to estimate the effect of adhering to the intervention?
	Risk of bias judgement
Bias due to missing outcome data	3.1 Were data for this outcome available for all, or nearly all, participants randomized?
	3.2 If N/PN/NI to 3.1: Is there evidence that result was not biased by missing outcome data?
	3.3 If N/PN to 3.2: Could missingness in the outcome depend on its true value?
	3.4 If Y/PY/NI to 3.3: Is it likely that missingness in the outcome depended on its true value?
	Risk of bias judgement
Bias in measurement of the outcome	4.1 Was the method of measuring the outcome inappropriate?
	4.2 Could measurement or ascertainment of the outcome have differed between intervention groups?
	4.3 Were outcome assessors aware of the intervention received by study participants?
	4.4 If Y/PY/NI to 4.3: Could assessment of the outcome have been influenced by knowledge of intervention received?
	4.5 If Y/PY/NI to 4.4: Is it likely that assessment of the outcome was influenced by knowledge of intervention received?
	Risk of bias judgement
Bias in selection of the reported result	5.1 Were the data that produced this result analysed in accordance with a pre-specified analysis plan that was finalized before unblinded outcome data were available for analysis?
	5.2 ... multiple eligible outcome measurements (e.g. scales, definitions, time points) within the outcome domain?
	5.3 ... multiple eligible analyses of the data?
	Risk of bias judgement
Overall bias	Risk of bias judgement

## Sheet: Print_format (ITT)
Unique ID		Study ID		Assessor
Ref or Label		Aim	assignment to intervention (the 'intention-to-treat' effect)
Experimental		Comparator		Source
Outcome		Results		Weight
Domain	Signalling question			Response	Comments
Bias arising from the randomization process	1.1 Was the allocation sequence random?
	1.2 Was the allocation sequence concealed until participants were enrolled and assigned to interventions?
	1.3 Did baseline differences between intervention groups suggest a problem with the randomization process?
	Risk of bias judgement
Bias due to deviations from intended interventions	2.1.Were participants aware of their assigned intervention during the trial?
	2.2.Were carers and people delivering the interventions aware of participants' assigned intervention during the trial?
	2.3. If Y/PY/NI to 2.1 or 2.2: Were there deviations from the intended intervention that arose because of the experimental context?
	2.4 If Y/PY to 2.3: Were these deviations likely to have affected the outcome?
	2.5. If Y/PY/NI to 2.4: Were these deviations from intended intervention balanced between groups?
	2.6 Was an appropriate analysis used to estimate the effect of assignment to intervention?
	2.7 If N/PN/NI to 2.6: Was there potential for a substantial impact (on the result) of the failure to analyse participants in the group to which they were randomized?
	Risk of bias judgement
Bias due to missing outcome data	3.1 Were data for this outcome available for all, or nearly all, participants randomized?
	3.2 If N/PN/NI to 3.1: Is there evidence that result was not biased by missing outcome data?
	3.3 If N/PN to 3.2: Could missingness in the outcome depend on its true value?
	3.4 If Y/PY/NI to 3.3: Is it likely that missingness in the outcome depended on its true value?
	Risk of bias judgement
Bias in measurement of the outcome	4.1 Was the method of measuring the outcome inappropriate?
	4.2 Could measurement or ascertainment of the outcome have differed between intervention groups?
	4.3 Were outcome assessors aware of the intervention received by study participants?
	4.4 If Y/PY/NI to 4.3: Could assessment of the outcome have been influenced by knowledge of intervention received?
	4.5 If Y/PY/NI to 4.4: Is it likely that assessment of the outcome was influenced by knowledge of intervention received?
	Risk of bias judgement
Bias in selection of the reported result	5.1 Were the data that produced this result analysed in accordance with a pre-specified analysis plan that was finalized before unblinded outcome data were available for analysis?
	5.2 ... multiple eligible outcome measurements (e.g. scales, definitions, time points) within the outcome domain?
	5.3 ... multiple eligible analyses of the data?
	Risk of bias judgement
Overall bias	Risk of bias judgement

## Sheet: Function Tab
	Journal article(s) with results of the trial	NA	Yes		1.1 Was the allocation sequence random?		2.1 Were participants aware of their assigned intervention during the trial?	2.1 Were participants aware of their assigned intervention during the trial?		3.1 Were data for this outcome available for all, or nearly all, participants randomized?	Individually Randomized, Parallel Group Trials	4.1 Was the method of measuring the outcome inappropriate?	assignment to intervention (the 'intention-to-treat' effect)	5.1 Were the data that produced this result analysed in accordance with a pre-specified analysis plan that was finalized before unblinded outcome data were available for analysis?				occurance of non-protocol interventions
NA	Trial protocol	Favours experimental	No (Please include reasons in the note)	Y	1.2 Was the allocation sequence concealed until participants were enrolled and assigned to interventions?	Low	2.2 Were carers and people delivering the interventions aware of participants' assigned intervention during the trial?	2.2 Were carers and people delivering the interventions aware of participants' assigned intervention during the trial?		3.2 If N/PN/NI to 3.1: Is there evidence that the result was not biased by missing outcome data?		4.2 Could measurement or ascertainment of the outcome have differed between intervention groups?	adhering to intervention (the 'per-protocol' effect)	5.2 ... multiple eligible outcome measurements (e.g. scales, definitions, time points) within the outcome domain?				failures in implementing the intervention that could have affected the outcome
Y	Statistical analysis plan (SAP)	Favours comparator		PY	1.3 Did baseline differences between intervention groups suggest a problem with the randomization process?	High	2.3 [if applicable:] If Y/PY/NI to 2.1 or 2.2: Were important non- protocol interventions balanced across intervention groups?	2.3 If Y/PY/NI to 2.1 or 2.2: Were there deviations from the intended intervention that arose because of the experimental context?		3.3 If N/PN to 3.2: Could missingness in the outcome depend on its true value?		4.3 If N/PN/NI to 4.1 and 4.2: Were outcome assessors aware of the intervention received by study participants?		5.3 ... multiple eligible analyses of the data?				non-adherence to their assigned intervention by trial participants
PY	Non-commercial trial registry record (e.g. ClinicalTrials.gov record)	Towards null		PN		Some concerns	2.4 [if applicable:] Were there failures in implementing the intervention that could have affected the outcome?	2.4 If Y/PY to 2.3: Were these deviations likely to have affected the outcome?		3.4 If Y/PY/NI to 3.3: Is it likely that missingness in the outcome depended on its true value?		4.4 If Y/PY/NI to 4.3: Could assessment of the outcome have been influenced by knowledge of intervention received?
PN	Company-owned trial registry record (e.g. GSK Clinical Study Register record)	Away from null		N			2.5 [if applicable:] Was there non-adherence to the assigned intervention regimen that could have affected participants’ outcomes?	2.5. If Y/PY/NI to 2.4: Were these deviations from intended intervention balanced between groups?				4.5 If Y/PY/NI to 4.4: Is it likely that assessment of the outcome was influenced by knowledge of intervention received?
N	“Grey literature” (e.g. unpublished thesis)	Unpredictable		NI			2.6 If N/PN/NI to 2.3, or Y/PY/NI to 2.4 or 2.5: Was an appropriate analysis used to estimate the effect of adhering to the intervention?	2.6 Was an appropriate analysis used to estimate the effect of assignment to intervention?
NI	Conference abstract(s) about the trial							2.7 If N/PN/NI to 2.6: Was there potential for a substantial impact (on the result) of the failure to analyse participants in the group to which they were randomized?
	Regulatory document (e.g. Clinical Study Report, Drug Approval Package)
	Research ethics application
	Grant database summary (e.g. NIH RePORTER, UKRI Gateway to Research)
	Personal communication with trialist
	Personal communication with the sponsor
