# Supplementary material for: Efficacy of probiotics in multiple sclerosis: a systematic review of preclinical trials and meta-analysis of randomized controlled trials
Source: Royal Society of Chemistry journal article supplement (doi:10.1039/d0fo03203d), 2021-01-01
Supplement: d0fo03203d3.pdf [file d0fo03203d3.pdf]

**Table S9.** Study quality and Risk of Bias assessment checklist

Hooijmans et al. SYRCLE’s risk of bias tool for animal studies. BMC Medical Research Methodology 2014, 14:43 <http://www.biomedcentral.com/1471-2288/14/43>.

|                          | Selection bias                                                 | Selection bias                                                                                | Selection bias                              | Performance bias                                           | Performance bias                                                                                                                  | Detection bias                                             | Detection bias                       | Attrition bias                                        | Reporting bias                                                   | Other                                                                                       |
|--------------------------|----------------------------------------------------------------|-----------------------------------------------------------------------------------------------|---------------------------------------------|------------------------------------------------------------|-----------------------------------------------------------------------------------------------------------------------------------|------------------------------------------------------------|--------------------------------------|-------------------------------------------------------|------------------------------------------------------------------|---------------------------------------------------------------------------------------------|
| Study (1st Author, Year) | 1. Was the allocation sequence adequately generated & applied? | 2. Were the groups similar at baseline or were they adjusted for confounders in the analysis? | 3. Was the allocation adequately concealed? | 4. Were the animals randomly housed during the experiment? | 5. Were the caregivers and/or investigators blinded from knowledge which intervention each animal received during the experiment? | 6. Were animals selected at random for outcome assessment? | 7. Was the outcome assessor blinded? | 8. Were incomplete outcome data adequately addressed? | 9. Are reports of the study free of selective outcome reporting? | 10. Was the study apparently free of other problems that could result in high risk of bias? |
| Kobayashi (2009) 1       | UC                                                             | UC                                                                                            | UC                                          | UC                                                         | UC                                                                                                                                | UC                                                         | UC                                   | Y                                                     | Y                                                                | Y                                                                                           |
| Lavasani (2010) 2        | UC                                                             | Y                                                                                             | UC                                          | UC                                                         | UC                                                                                                                                | UC                                                         | UC                                   | Y                                                     | Y                                                                | UC                                                                                          |
| Reparaz (2010)2.1        | UC                                                             | UC                                                                                            | UC                                          | UC                                                         | UC                                                                                                                                | UC                                                         | UC                                   | Y                                                     | Y                                                                | Y                                                                                           |
| Takata (2011) 3          | UC                                                             | Y                                                                                             | UC                                          | UC                                                         | UC                                                                                                                                | UC                                                         | UC                                   | Y                                                     | Y                                                                | Y                                                                                           |
| Kobayashi (2012) 4       | UC                                                             | Y                                                                                             | UC                                          | UC                                                         | UC                                                                                                                                | UC                                                         | UC                                   | Y                                                     | Y                                                                | Y                                                                                           |
| Kwon (2013) 5            | UC                                                             | Y                                                                                             | UC                                          | UC                                                         | UC                                                                                                                                | UC                                                         | UC                                   | Y                                                     | Y                                                                | UC                                                                                          |

|                                   | Selection bias                                                 | Selection bias                                                                                | Selection bias                              | Performance bias                                           | Performance bias                                                                                                                  | Detection bias                                             | Detection bias                       | Attrition bias                                        | Reporting bias                                                   | Other                                                                                       |
|-----------------------------------|----------------------------------------------------------------|-----------------------------------------------------------------------------------------------|---------------------------------------------|------------------------------------------------------------|-----------------------------------------------------------------------------------------------------------------------------------|------------------------------------------------------------|--------------------------------------|-------------------------------------------------------|------------------------------------------------------------------|---------------------------------------------------------------------------------------------|
| Study<br>(1st Author, Year)       | 1. Was the allocation sequence adequately generated & applied? | 2. Were the groups similar at baseline or were they adjusted for confounders in the analysis? | 3. Was the allocation adequately concealed? | 4. Were the animals randomly housed during the experiment? | 5. Were the caregivers and/or investigators blinded from knowledge which intervention each animal received during the experiment? | 6. Were animals selected at random for outcome assessment? | 7. Was the outcome assessor blinded? | 8. Were incomplete outcome data adequately addressed? | 9. Are reports of the study free of selective outcome reporting? | 10. Was the study apparently free of other problems that could result in high risk of bias? |
| Goudarzvand (2016) 6              | Y                                                              | UC                                                                                            | UC                                          | UC                                                         | UC                                                                                                                                | Y                                                          | UC                                   | Y                                                     | Y                                                                | Y                                                                                           |
| Abdurasulova (2016)7              | UC                                                             | Y                                                                                             | UC                                          | UC                                                         | UC                                                                                                                                | UC                                                         | UC                                   | Y                                                     | Y                                                                | Y                                                                                           |
| Abdurasulova, (2017) <sup>8</sup> | UC                                                             | Y                                                                                             | UC                                          | UC                                                         | UC                                                                                                                                | UC                                                         | UC                                   | Y                                                     | Y                                                                | Y                                                                                           |
| Salehipour (2017) <sup>9</sup>    | Y                                                              | Y                                                                                             | UC                                          | UC                                                         | Y                                                                                                                                 | Y                                                          | Y                                    | Y                                                     | Y                                                                | Y                                                                                           |
| Secher (2017) <sup>10</sup>       | UC                                                             | Y                                                                                             | UC                                          | UC                                                         | UC                                                                                                                                | UC                                                         | UC                                   | Y                                                     | Y                                                                | Y                                                                                           |
| Yamashita (2018)11                | UC                                                             | Y                                                                                             | UC                                          | UC                                                         | UC                                                                                                                                | UC                                                         | UC                                   | Y                                                     | UC                                                               | Y                                                                                           |

|                             | Selection bias                                                 | Selection bias                                                                                | Selection bias                              | Performance bias                                           | Performance bias                                                                                                                  | Detection bias                                             | Detection bias                       | Attrition bias                                        | Reporting bias                                                   | Other                                                                                       |
|-----------------------------|----------------------------------------------------------------|-----------------------------------------------------------------------------------------------|---------------------------------------------|------------------------------------------------------------|-----------------------------------------------------------------------------------------------------------------------------------|------------------------------------------------------------|--------------------------------------|-------------------------------------------------------|------------------------------------------------------------------|---------------------------------------------------------------------------------------------|
| Study<br>(1st Author, Year) | 1. Was the allocation sequence adequately generated & applied? | 2. Were the groups similar at baseline or were they adjusted for confounders in the analysis? | 3. Was the allocation adequately concealed? | 4. Were the animals randomly housed during the experiment? | 5. Were the caregivers and/or investigators blinded from knowledge which intervention each animal received during the experiment? | 6. Were animals selected at random for outcome assessment? | 7. Was the outcome assessor blinded? | 8. Were incomplete outcome data adequately addressed? | 9. Are reports of the study free of selective outcome reporting? | 10. Was the study apparently free of other problems that could result in high risk of bias? |
| Consonni (2018) 12          | Y                                                              | UC                                                                                            | Y                                           | Y                                                          | Y                                                                                                                                 | Y                                                          | Y                                    | Y                                                     | Y                                                                | Y                                                                                           |
| Chen et al (2019) 13        | Y                                                              | Y                                                                                             | UC                                          | UC                                                         | UC                                                                                                                                | UC                                                         | UC                                   | Y                                                     | Y                                                                | Y                                                                                           |
| He (2019) 14                | UC                                                             | Y                                                                                             | UC                                          | UC                                                         | UC                                                                                                                                | UC                                                         | UC                                   | Y                                                     | Y                                                                | Y                                                                                           |
| Shahi (2014) 14.1           | UC                                                             | UC                                                                                            | UC                                          | UC                                                         | UC                                                                                                                                | UC                                                         | UC                                   | UC                                                    | Y                                                                | Y                                                                                           |
| Bajic (2020) 15             | UC                                                             | Y                                                                                             | UC                                          | UC                                                         | UC                                                                                                                                | UC                                                         | UC                                   | Y                                                     | Y                                                                | Y                                                                                           |
| Dargahi (2020) 16           | UC                                                             | UC                                                                                            | UC                                          | UC                                                         | UC                                                                                                                                | UC                                                         | UC                                   | UC                                                    | UC                                                               | UC                                                                                          |
| Barreiro (2020) 17          | Y                                                              | Y                                                                                             | UC                                          | UC                                                         | UC                                                                                                                                | Y                                                          | UC                                   | Y                                                     | Y                                                                | Y                                                                                           |
| Samani (2020) 18            | Y                                                              | UC                                                                                            | UC                                          | Y                                                          | UC                                                                                                                                | UC                                                         | UC                                   | Y                                                     | Y                                                                | Y                                                                                           |

|                                     | <b>Selection bias</b>                                                     | <b>Selection bias</b>                                                                                | <b>Selection bias</b>                              | <b>Performance bias</b>                                           | <b>Performance bias</b>                                                                                                                  | <b>Detection bias</b>                                             | <b>Detection bias</b>                       | <b>Attrition bias</b>                                        | <b>Reporting bias</b>                                                   | <b>Other</b>                                                                                       |
|-------------------------------------|---------------------------------------------------------------------------|------------------------------------------------------------------------------------------------------|----------------------------------------------------|-------------------------------------------------------------------|------------------------------------------------------------------------------------------------------------------------------------------|-------------------------------------------------------------------|---------------------------------------------|--------------------------------------------------------------|-------------------------------------------------------------------------|----------------------------------------------------------------------------------------------------|
| <b>Study<br/>(1st Author, Year)</b> | <b>1. Was the allocation sequence adequately generated &amp; applied?</b> | <b>2. Were the groups similar at baseline or were they adjusted for confounders in the analysis?</b> | <b>3. Was the allocation adequately concealed?</b> | <b>4. Were the animals randomly housed during the experiment?</b> | <b>5. Were the caregivers and/or investigators blinded from knowledge which intervention each animal received during the experiment?</b> | <b>6. Were animals selected at random for outcome assessment?</b> | <b>7. Was the outcome assessor blinded?</b> | <b>8. Were incomplete outcome data adequately addressed?</b> | <b>9. Are reports of the study free of selective outcome reporting?</b> | <b>10. Was the study apparently free of other problems that could result in high risk of bias?</b> |
| <b>Mestre (2020) 19</b>             | Uc                                                                        | Y                                                                                                    | UC                                                 | UC                                                                | UC                                                                                                                                       | UC                                                                | UC                                          | Y                                                            | Y                                                                       | Y                                                                                                  |
| <b>Digebsara (2020) 20</b>          | UC                                                                        | UC                                                                                                   | UC                                                 | UC                                                                | UC                                                                                                                                       | Y                                                                 | UC                                          | UC                                                           | Y                                                                       | Y                                                                                                  |
