# Supplementary material for: Efficacy of probiotics in multiple sclerosis: a systematic review of preclinical trials and meta-analysis of randomized controlled trials
Source: Royal Society of Chemistry journal article supplement (doi:10.1039/d0fo03203d), 2021-01-01
Supplement: d0fo03203d4.pdf [file d0fo03203d4.pdf]

## Appendix S4 GRADE summary for efficacy of probiotics on mental health in patients with multiple sclerosis

### (a) EDSS scores

| Probiotic compared to Placebo for Multiple sclerosis                                                                                                                                                                                                                                      |                                          |                                                                                                        |                          |                              |                                   |                           |
|-------------------------------------------------------------------------------------------------------------------------------------------------------------------------------------------------------------------------------------------------------------------------------------------|------------------------------------------|--------------------------------------------------------------------------------------------------------|--------------------------|------------------------------|-----------------------------------|---------------------------|
| Patient or population: patients with Multiple sclerosis                                                                                                                                                                                                                                   |                                          |                                                                                                        |                          |                              |                                   |                           |
| Settings:                                                                                                                                                                                                                                                                                 |                                          |                                                                                                        |                          |                              |                                   |                           |
| Intervention: Probiotic                                                                                                                                                                                                                                                                   |                                          |                                                                                                        |                          |                              |                                   |                           |
| Comparison: Placebo                                                                                                                                                                                                                                                                       |                                          |                                                                                                        |                          |                              |                                   |                           |
| Outcomes                                                                                                                                                                                                                                                                                  | Illustrative comparative risks* (95% CI) |                                                                                                        | Relative effect (95% CI) | No of Participants (studies) | Quality of the evidence (GRADE)   | Comments                  |
|                                                                                                                                                                                                                                                                                           | Assumed risk                             | Corresponding risk                                                                                     |                          |                              |                                   |                           |
|                                                                                                                                                                                                                                                                                           | Placebo                                  | Probiotic                                                                                              |                          |                              |                                   |                           |
| EDSS scores                                                                                                                                                                                                                                                                               |                                          | The mean edss scores in the intervention groups was 1.22 standard deviations lower (2.4 to 0.03 lower) |                          | 173 (3 studies)              | ⊕⊕⊕⊕<br>very low <sup>1,2,3</sup> | SMD -1.22 (-2.4 to -0.03) |
| Follow-up: 3 months                                                                                                                                                                                                                                                                       |                                          |                                                                                                        |                          |                              |                                   |                           |
| *The basis for the assumed risk (e.g. the median control group risk across studies) is provided in footnotes. The corresponding risk (and its 95% confidence interval) is based on the assumed risk in the comparison group and the relative effect of the intervention (and its 95% CI). |                                          |                                                                                                        |                          |                              |                                   |                           |
| CI: Confidence interval;                                                                                                                                                                                                                                                                  |                                          |                                                                                                        |                          |                              |                                   |                           |
| GRADE Working Group grades of evidence                                                                                                                                                                                                                                                    |                                          |                                                                                                        |                          |                              |                                   |                           |
| High quality: Further research is very unlikely to change our confidence in the estimate of effect.                                                                                                                                                                                       |                                          |                                                                                                        |                          |                              |                                   |                           |
| Moderate quality: Further research is likely to have an important impact on our confidence in the estimate of effect and may change the estimate.                                                                                                                                         |                                          |                                                                                                        |                          |                              |                                   |                           |
| Low quality: Further research is very likely to have an important impact on our confidence in the estimate of effect and is likely to change the estimate.                                                                                                                                |                                          |                                                                                                        |                          |                              |                                   |                           |
| Very low quality: We are very uncertain about the estimate.                                                                                                                                                                                                                               |                                          |                                                                                                        |                          |                              |                                   |                           |
| <sup>1</sup> serious inconsistency due to high heterogeneity with 75%<12.                                                                                                                                                                                                                 |                                          |                                                                                                        |                          |                              |                                   |                           |
| <sup>2</sup> serious indirectness due to different strains and intervention time in all studies.                                                                                                                                                                                          |                                          |                                                                                                        |                          |                              |                                   |                           |
| <sup>3</sup> serious imprecision due to the small sample size (< 400 individuals) and wide confidence interval.                                                                                                                                                                           |                                          |                                                                                                        |                          |                              |                                   |                           |

### (b) BDI scores

| Probiotic compared to Placebo for Multiple sclerosis                                                                                                                                                                                                                                      |                                          |                                                                                                        |                          |                              |                                   |                            |
|-------------------------------------------------------------------------------------------------------------------------------------------------------------------------------------------------------------------------------------------------------------------------------------------|------------------------------------------|--------------------------------------------------------------------------------------------------------|--------------------------|------------------------------|-----------------------------------|----------------------------|
| Patient or population: patients with Multiple sclerosis                                                                                                                                                                                                                                   |                                          |                                                                                                        |                          |                              |                                   |                            |
| Settings:                                                                                                                                                                                                                                                                                 |                                          |                                                                                                        |                          |                              |                                   |                            |
| Intervention: Probiotic                                                                                                                                                                                                                                                                   |                                          |                                                                                                        |                          |                              |                                   |                            |
| Comparison: Placebo                                                                                                                                                                                                                                                                       |                                          |                                                                                                        |                          |                              |                                   |                            |
| Outcomes                                                                                                                                                                                                                                                                                  | Illustrative comparative risks* (95% CI) |                                                                                                        | Relative effect (95% CI) | No of Participants (studies) | Quality of the evidence (GRADE)   | Comments                   |
|                                                                                                                                                                                                                                                                                           | Assumed risk                             | Corresponding risk                                                                                     |                          |                              |                                   |                            |
|                                                                                                                                                                                                                                                                                           | Placebo                                  | Probiotic                                                                                              |                          |                              |                                   |                            |
| BDI scores                                                                                                                                                                                                                                                                                |                                          | The mean bdi scores in the intervention groups was 1.58 standard deviations lower (3.03 to 0.12 lower) |                          | 173 (3 studies)              | ⊕⊕⊕⊕<br>very low <sup>1,2,3</sup> | SMD -1.58 (-3.03 to -0.12) |
| Follow-up: 3 months                                                                                                                                                                                                                                                                       |                                          |                                                                                                        |                          |                              |                                   |                            |
| *The basis for the assumed risk (e.g. the median control group risk across studies) is provided in footnotes. The corresponding risk (and its 95% confidence interval) is based on the assumed risk in the comparison group and the relative effect of the intervention (and its 95% CI). |                                          |                                                                                                        |                          |                              |                                   |                            |
| CI: Confidence interval;                                                                                                                                                                                                                                                                  |                                          |                                                                                                        |                          |                              |                                   |                            |
| GRADE Working Group grades of evidence                                                                                                                                                                                                                                                    |                                          |                                                                                                        |                          |                              |                                   |                            |
| High quality: Further research is very unlikely to change our confidence in the estimate of effect.                                                                                                                                                                                       |                                          |                                                                                                        |                          |                              |                                   |                            |
| Moderate quality: Further research is likely to have an important impact on our confidence in the estimate of effect and may change the estimate.                                                                                                                                         |                                          |                                                                                                        |                          |                              |                                   |                            |
| Low quality: Further research is very likely to have an important impact on our confidence in the estimate of effect and is likely to change the estimate.                                                                                                                                |                                          |                                                                                                        |                          |                              |                                   |                            |
| Very low quality: We are very uncertain about the estimate.                                                                                                                                                                                                                               |                                          |                                                                                                        |                          |                              |                                   |                            |
| <sup>1</sup> serious inconsistency due to high heterogeneity with 75%<12.                                                                                                                                                                                                                 |                                          |                                                                                                        |                          |                              |                                   |                            |
| <sup>2</sup> serious indirectness due to different strains and intervention time in all studies.                                                                                                                                                                                          |                                          |                                                                                                        |                          |                              |                                   |                            |
| <sup>3</sup> serious imprecision due to the small sample size (< 400 individuals) and wide confidence interval.                                                                                                                                                                           |                                          |                                                                                                        |                          |                              |                                   |                            |

### (c) GHQ scores

| Probiotic compared to Placebo for Multiple sclerosis                                                                                                                                                                                                                                      |                                          |                                                                                                       |                          |                              |                                 |                           |
|-------------------------------------------------------------------------------------------------------------------------------------------------------------------------------------------------------------------------------------------------------------------------------------------|------------------------------------------|-------------------------------------------------------------------------------------------------------|--------------------------|------------------------------|---------------------------------|---------------------------|
| Patient or population: patients with Multiple sclerosis                                                                                                                                                                                                                                   |                                          |                                                                                                       |                          |                              |                                 |                           |
| Settings:                                                                                                                                                                                                                                                                                 |                                          |                                                                                                       |                          |                              |                                 |                           |
| Intervention: Probiotic                                                                                                                                                                                                                                                                   |                                          |                                                                                                       |                          |                              |                                 |                           |
| Comparison: Placebo                                                                                                                                                                                                                                                                       |                                          |                                                                                                       |                          |                              |                                 |                           |
| Outcomes                                                                                                                                                                                                                                                                                  | Illustrative comparative risks* (95% CI) |                                                                                                       | Relative effect (95% CI) | No of Participants (studies) | Quality of the evidence (GRADE) | Comments                  |
|                                                                                                                                                                                                                                                                                           | Assumed risk                             | Corresponding risk                                                                                    |                          |                              |                                 |                           |
|                                                                                                                                                                                                                                                                                           | Placebo                                  | Probiotic                                                                                             |                          |                              |                                 |                           |
| GHQ scores                                                                                                                                                                                                                                                                                |                                          | The mean ghq scores in the intervention groups was 0.71 standard deviations lower (1.02 to 0.4 lower) |                          | 173 (3 studies)              | ⊕⊕⊕⊕<br>low <sup>1,2</sup>      | SMD -0.71 (-1.02 to -0.4) |
| Follow-up: 3 months                                                                                                                                                                                                                                                                       |                                          |                                                                                                       |                          |                              |                                 |                           |
| *The basis for the assumed risk (e.g. the median control group risk across studies) is provided in footnotes. The corresponding risk (and its 95% confidence interval) is based on the assumed risk in the comparison group and the relative effect of the intervention (and its 95% CI). |                                          |                                                                                                       |                          |                              |                                 |                           |
| CI: Confidence interval;                                                                                                                                                                                                                                                                  |                                          |                                                                                                       |                          |                              |                                 |                           |
| GRADE Working Group grades of evidence                                                                                                                                                                                                                                                    |                                          |                                                                                                       |                          |                              |                                 |                           |
| High quality: Further research is very unlikely to change our confidence in the estimate of effect.                                                                                                                                                                                       |                                          |                                                                                                       |                          |                              |                                 |                           |
| Moderate quality: Further research is likely to have an important impact on our confidence in the estimate of effect and may change the estimate.                                                                                                                                         |                                          |                                                                                                       |                          |                              |                                 |                           |
| Low quality: Further research is very likely to have an important impact on our confidence in the estimate of effect and is likely to change the estimate.                                                                                                                                |                                          |                                                                                                       |                          |                              |                                 |                           |
| Very low quality: We are very uncertain about the estimate.                                                                                                                                                                                                                               |                                          |                                                                                                       |                          |                              |                                 |                           |
| <sup>1</sup> serious indirectness due to different strains and intervention time in all studies.                                                                                                                                                                                          |                                          |                                                                                                       |                          |                              |                                 |                           |
| <sup>2</sup> serious imprecision due to the small sample size (< 400 individuals) and wide confidence interval.                                                                                                                                                                           |                                          |                                                                                                       |                          |                              |                                 |                           |

### (d) DASS scores

**Patient or population:** patients with Multiple sclerosis  
**Settings:**  
**Intervention:** Probiotic  
**Comparison:** Placebo

\*The basis for the **assumed risk** (e.g. the median control group risk across studies) is provided in footnotes. The **corresponding risk** (and its 95% confidence interval) is based on the assumed risk in the comparison group and the **relative effect** of the intervention (and its 95% CI).

GRADE Working Group grades of evidence

**High quality:** Further research is very unlikely to change our confidence in the estimate of effect.

**Moderate quality:** Further research is likely to have an important impact on our confidence in the estimate of effect and may change the estimate.

**Low quality:** Further research is very likely to have an important impact on our confidence in the estimate of effect and is likely to change the estimate.

**Very low quality:** We are very uncertain about the estimate.

<sup>1</sup> serious indirectness due to different strains and intervention time the two studies.

<sup>2</sup> very serious imprecision due to the small sample size (< 400 individuals) and wide confidence interval.
